# Supplementary material
Source: PubMed Central journal article supplement (PMC10224820)

**Figure S1**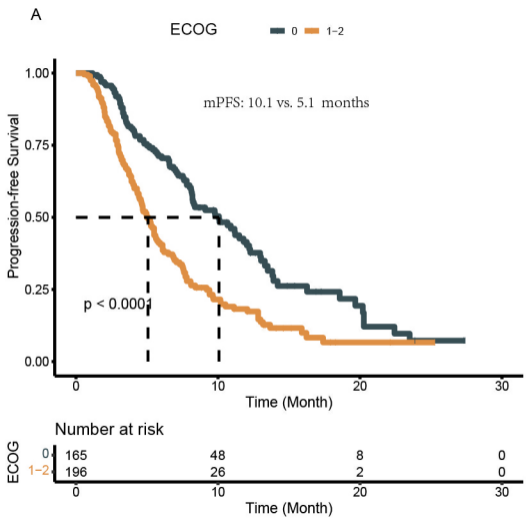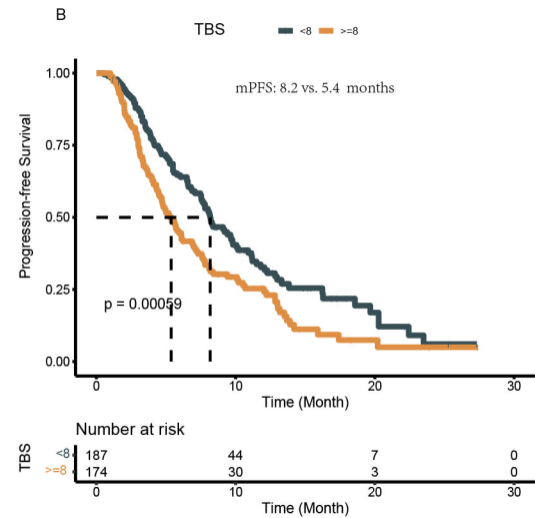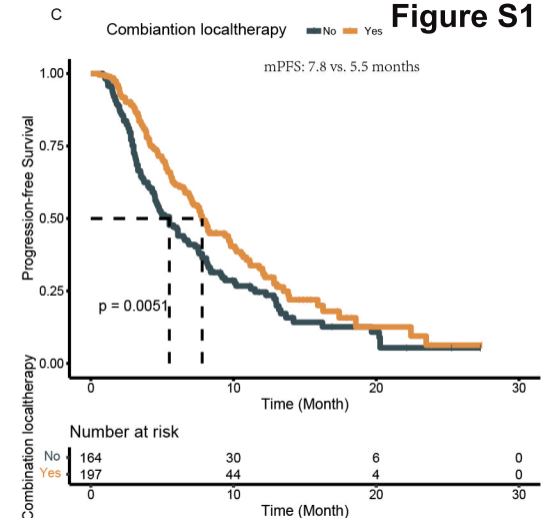

Supplement: 12072_2022_10480_MOESM1_ESM.pdf [file 12072_2022_10480_MOESM1_ESM.pdf]
